# Supplementary material for: Diversity of greenspace design and management impacts pollinator communities in a densely urbanized landscape: the city of Paris, France
Source: Springer Nature journal article supplement (doi:10.1007/s11252-023-01351-x), 2023-03-30
Supplement: MOESM2 [file 25191116]

in Zaninotto Vincent	Fauviau Arthur	Dajoz Isabelle (2023) Diversity of greenspace design and management impacts pollinator communities in a densely urbanized landscape: the city of Paris	France. Urban Ecosystems
Vincent Zaninotto (corresponding author)	Institute of Ecology and Environmental Sciences-Paris (iEES-Paris)	Sorbonne Universit�	CNRS	IRD	INRAE	Universit� Paris Cit�	UPEC. 4 place Jussieu	75005 Paris	France.	Direction des Espaces verts et de l�Environnement	Ville de Paris. 103 avenue de France 75013 Paris	France. Email: vincent.zaninotto@normalesup.org ORCID: 0000-0002-3397-398X
Plant species	Spontaneous/ornamental	Origin	Growth form	AP	BL	BR	BS	CT	JP	LB	MC	MT	PE	SV	VL
Acanthus mollis	Ornamental	Exotic	Perennial					1							1
Achillea filipendulina	Spontaneous (Subspontaneous)	Exotic	Perennial		1
Achillea millefolium	Spontaneous	Native	Perennial		1	1			1			1
Achillea ptarmica	Ornamental	Native	Perennial							1
Acmella oleracea	Ornamental	Exotic	Perennial						1
Aesculus parviflora	Ornamental	Exotic	Perennial			1
Agastache foeniculum	Ornamental	Exotic	Perennial												1
Agastache mexicana	Ornamental	Exotic	Perennial								1				1
Ageratum houstonianium	Ornamental	Exotic	Annual				1
Ajuga reptans	Spontaneous	Native	Perennial			1
Alliara petiolata	Spontaneous	Native	Biennial											1
Allium ampeloprasum	Ornamental	Exotic	Perennial				1
Allium nigrum	Ornamental	Exotic	Perennial		1	1	1
Allium sphaerocephalon	Ornamental	Native	Perennial										1
Althaea officinalis	Spontaneous	Native (archeophyte)	Perennial				1
Amaranthus cruentus	Spontaneous (Subspontaneous)	Exotic	Annual								1
Amaryllis belladona	Ornamental	Exotic	Perennial			1
Anacamptis pyramidalis	Spontaneous	Native	Perennial									1
Anaphalis margaritacea	Ornamental	Exotic	Perennial							1
Anemone blanda	Spontaneous (Subspontaneous)	Exotic	Perennial				1
Anemone hupehensis	Ornamental	Exotic	Perennial			1									1
Anemone nemorosa	Spontaneous	Native	Perennial			1	1
Anemone x blanda	Ornamental	Horticultural	Perennial							1
Angelica archangelica	Ornamental	Exotic	Biennial					1
Anthemis cotula	Ornamental	Native	Annual				1
Anthericum liliago	Ornamental	Native	Perennial					1
Anthriscus sylvestris	Spontaneous	Native	Annual				1		1				1	1
Antirrhinum majus	Ornamental	Exotic	Perennial		1
Aquilegia alpina	Ornamental	Exotic	Perennial						1
Aquilegia vulgaris	Ornamental	Native	Perennial				1
Arabis caucasica	Ornamental	Exotic	Perennial						1
Arctium lappa	Spontaneous	Native	Biennial											1
Artemisia absinthium	Ornamental	Native (archeophyte)	Perennial				1
Artemisia annua	Spontaneous	Exotic (naturalized)	Annual				1
Aruncus dioicus	Ornamental	Exotic	Perennial					1
Asparagus aethiopicus	Ornamental	Exotic	Perennial							1
Ballota nigra	Spontaneous	Native	Perennial											1
Begonia cucullata	Ornamental	Exotic	Perennial							1					1
Begonia x samperflorens	Ornamental	Exotic	Perennial						1
Bellis perennis	Spontaneous	Native	Perennial	1		1	1		1	1		1			1
Bellis perennis (double)	Ornamental	Horticultural	Perennial		1				1		1
Berberis aquifolium	Ornamental	Exotic (invasive)	Perennial								1
Bidens ferulifolia	Ornamental	Exotic	Annual				1								1
Bidens pilosa	Ornamental	Exotic	Annual		1		1
Borago officinalis	Spontaneous (Subspontaneous)	Exotic	Annual		1					1	1				1
Brunnera macrophylla	Ornamental	Exotic	Perennial			1
Bryonia dioica	Spontaneous	Native	Perennial						1
Buddleja davidii	Ornamental	Exotic (invasive)	Perennial							1
Buxus sempervirens	Ornamental	Native (archeophyte)	Perennial												1
Calceolaria integrifolia	Ornamental	Exotic	Perennial		1
Calendula officinalis	Ornamental	Exotic	Perennial		1		1
Calluna vulgaris	Ornamental	Native	Perennial			1
Campanula medium	Ornamental	Exotic	Biennial		1
Campanula muralis	Ornamental	Exotic	Perennial							1
Campanula persicifolia	Ornamental	Native	Perennial			1				1
Campanula poscharskyana	Ornamental	Exotic	Perennial							1				1
Campanula pyramidalis	Ornamental	Exotic	Perennial				1
Campanula rapunculoides	Spontaneous	Native (archeophyte)	Perennial						1
Canna indica	Ornamental	Exotic	Perennial						1
Cardamine hirsuta	Spontaneous	Native	Annual		1			1
Catananche caerulea	Spontaneous (Subspontaneous)	Exotic	Perennial		1
Centaurea nigra	Spontaneous	Native	Perennial	1									1
Centranthus ruber	Ornamental	Native (archeophyte)	Perennial		1					1
Cerinthe major	Ornamental	Exotic	Annual		1
Chaerophyllum temulum	Spontaneous	Native	Biennial						1
Chelidonium majus	Spontaneous	Native	Perennial											1
Chionodoxa forbesii	Ornamental	Exotic	Perennial				1	1
Cichorium intybus	Spontaneous	Native	Perennial						1
Cirsium arvense	Spontaneous	Native	Perennial		1						1
Cirsium vulgare	Spontaneous	Native	Perennial						1
Clematis vitalba	Spontaneous	Native	Perennial										1
Clematis viticella	Ornamental	Exotic	Perennial					1
Colchicum autumnale	Ornamental	Native	Perennial				1
Convolvulus arvensis	Spontaneous	Native	Perennial		1				1
Convolvulus tricolor	Ornamental	Exotic	Annual		1
Coreopsis grandiflora	Ornamental	Exotic	Perennial						1
Coreopsis tinctoria	Ornamental	Exotic	Annual		1
Cornus florida	Ornamental	Exotic	Perennial												1
Cornus kousa	Ornamental	Exotic	Perennial												1
Cornus sanguinea	Ornamental	Native	Perennial	1					1
Coronilla varia	Spontaneous	Native	Perennial					1					1
Cosmos bipinnatus	Ornamental	Exotic	Annual		1					1					1
Cosmos sulphureus	Ornamental	Exotic	Annual		1
Cota tinctoria	Ornamental	Exotic (naturalized)	Biennial		1
Cotoneaster coriaceus	Ornamental	Exotic	Perennial								1
Crataegus monogyna	Ornamental	Native	Perennial						1
Crepis biennis	Spontaneous	Native	Biennial	1								1	1		1
Crepis capillaris	Spontaneous	Native	Annual	1								1		1
Crocosmia crocosmiiflora	Ornamental	Exotic	Perennial				1
Cuphea ignea	Ornamental	Exotic	Perennial		1										1
Cyanus segetum	Spontaneous	Native	Annual					1
Cyclamen hederifolium	Spontaneous (Subspontaneous)	Exotic	Perennial				1
Cymbalaria muralis	Spontaneous	Native	Perennial											1
Cynara cardunculus	Ornamental	Exotic	Perennial		1
Cynara scolymus	Ornamental	Exotic	Perennial		1
Cytisus villosus	Ornamental	Exotic	Perennial							1
Dahlia pinnata	Ornamental	Exotic	Perennial												1
Daucus carota	Spontaneous	Native	Biennial	1	1				1			1	1
Delphinium elatum	Ornamental	Exotic	Perennial								1
Dianthus barbatus	Ornamental	Exotic	Perennial		1	1			1	1	1
Dianthus carthusianorum	Spontaneous	Native	Perennial										1
Digitalis purpurea	Ornamental	Native	Biennial			1				1
Dipsacus fullonum	Spontaneous	Native	Biennial				1	1					1
Duchesnea indica	Spontaneous	Exotic (naturalized)	Perennial								1
Echinops sphaerocephalus	Ornamental	Exotic	Perennial				1
Echium vulgare	Spontaneous	Native	Biennial								1
Emilia coccinea	Ornamental	Exotic	Perennial						1
Epilobium angustifolium	Ornamental	Native	Perennial								1
Epilobium ciliatum	Spontaneous	Exotic (naturalized)	Perennial								1
Epilobium hirsutum	Spontaneous	Native	Perennial		1		1	1
Erica cinerea	Ornamental	Native	Perennial			1
Erigeron annuus	Spontaneous	Exotic (invasive)	Annual			1
Erigeron canadensis	Spontaneous	Exotic (invasive)	Annual	1		1
Erigeron karvinskianus	Ornamental	Exotic	Perennial		1	1				1					1
Erinus alpinus	Ornamental	Exotic	Perennial					1
Erodium cicutarium	Spontaneous	Native	Biennial									1
Erysimum cheiri	Ornamental	Native (archeophyte)	Perennial		1						1				1
Eschscholzia californica	Ornamental	Exotic	Annual		1		1
Euonymus japonicus	Ornamental	Exotic	Perennial								1
Euphorbia amygdaloides	Ornamental	Native	Perennial				1
Euphorbia characias	Ornamental	Exotic	Perennial		1			1
Euphorbia hypericifolia	Ornamental	Exotic	Perennial		1			1	1		1				1
Euphorbia rotundifolia	Ornamental	Exotic	Perennial				1
Exochorda racemosa	Ornamental	Exotic	Perennial							1
Fallopia convolvulus	Spontaneous	Native	Annual			1
Felicia amelloides	Ornamental	Exotic	Perennial					1
Ficaria ranunculoides	Spontaneous	Native	Perennial				1
Foeniculum vulgare	Ornamental	Native (archeophyte)	Perennial		1				1						1
Fuchsia magellanica	Ornamental	Exotic	Perennial				1			1					1
Gaillardia aristata	Ornamental	Exotic	Annual						1
Gaillardia pulchella	Ornamental	Exotic	Annual		1						1
Galega officinalis	Spontaneous	Exotic (invasive)	Perennial					1					1
Galium aparine	Spontaneous	Native	Annual											1
Galium verum	Spontaneous	Native	Perennial						1
Gazania rigens	Ornamental	Exotic	Perennial		1
Genista tinctoria	Ornamental	Native	Perennial										1
Geranium dissectum	Spontaneous	Native	Annual	1			1	1				1	1
Geranium endressii	Ornamental	Exotic	Perennial	1		1	1
Geranium molle	Spontaneous	Native	Annual			1
Geranium phaeum	Ornamental	Exotic	Perennial			1
Geranium robertianum	Spontaneous	Native	Biennial										1	1
Geranium rotundifolium	Spontaneous	Native	Annual				1
Geranium sanguineum	Ornamental	Native	Perennial										1
Geum coccineum	Ornamental	Exotic	Perennial							1
Geum urbanum	Spontaneous	Native	Perennial		1						1		1	1
Glebionis segetum	Spontaneous	Native	Annual					1
Glechoma hederacea	Spontaneous	Native	Perennial						1		1		1	1
Gomphrena globosa	Ornamental	Exotic	Annual				1				1				1
Hebe speciosa	Ornamental	Exotic	Perennial							1
Hedera helix	Spontaneous	Native	Perennial				1						1	1
Helianthemum apenninum	Spontaneous	Native	Perennial			1
Helianthemum nummularium	Ornamental	Native	Perennial							1
Helleborus foetidus	Ornamental	Native	Perennial					1
Helleborus x ericsmithii	Ornamental	Exotic	Perennial			1
Helminthotheca echioides	Spontaneous	Native	Annual	1	1	1		1			1		1
Heracleum sphondylium	Spontaneous	Native	Perennial											1
Hesperis matronalis	Spontaneous	Native (archeophyte)	Biennial					1			1
Heuchera sanguinea	Ornamental	Exotic	Perennial			1
Hibiscus syriacus	Ornamental	Exotic	Perennial							1	1
Hibiscus trionum	Ornamental	Exotic	Annual								1
Himantoglossum hircinum	Spontaneous	Native	Perennial									1
Honorius nutans	Spontaneous (Subspontaneous)	Exotic	Perennial				1
Hosta plantaginea	Ornamental	Exotic	Perennial				1	1
Hyacinthus orientalis	Ornamental	Exotic	Perennial							1
Hydrangea paniculata	Ornamental	Exotic	Perennial												1
Hypericum androsaemum	Ornamental	Native	Perennial							1					1
Hypericum perforatum	Spontaneous	Native	Perennial		1	1			1				1
Hypochaeris radicata	Spontaneous	Native	Perennial	1					1		1	1
Iberis sempervirens	Ornamental	Exotic	Perennial							1
Impatiens balfourii	Ornamental	Exotic (invasive)	Annual			1
Impatiens walleriana	Ornamental	Exotic	Perennial								1
Indigofera tinctoria	Ornamental	Exotic	Perennial												1
Inula helenium	Spontaneous	Native (archeophyte)	Perennial					1
Ipomoea cairica	Ornamental	Exotic	Perennial					1
Iris germanica	Ornamental	Exotic	Perennial				1
Isotoma axillaris	Ornamental	Exotic	Perennial				1	1		1
Jacobaea maritima	Ornamental	Exotic	Perennial		1		1
Jasminum nudiflorum	Ornamental	Exotic	Perennial		1
Kniphofia uvaria	Ornamental	Exotic	Perennial				1	1
Koelreuteria paniculata	Ornamental	Exotic	Perennial												1
Lactuca serriola	Spontaneous	Native	Annual		1
Lamium album	Spontaneous	Native	Perennial											1
Lamium purpureum	Spontaneous	Native	Annual					1						1	1
Lantana camara	Ornamental	Exotic	Perennial		1						1
Lapsana communis	Spontaneous	Native	Annual							1	1		1	1
Lathyrus latifolius	Spontaneous	Native (archeophyte)	Perennial						1
Lepidium draba	Spontaneous	Native (archeophyte)	Perennial		1
Levisticum officinale	Spontaneous (Subspontaneous)	Exotic	Perennial							1
Leycesteria formosa	Ornamental	Exotic	Perennial												1
Ligustrum vulgare	Ornamental	Native	Perennial	1					1				1
Linaria maroccana	Ornamental	Exotic	Annual						1
Linaria vulgaris	Spontaneous	Native	Perennial				1
Lobelia cardinalis	Ornamental	Exotic	Perennial								1
Lobelia erinus	Ornamental	Exotic	Perennial		1
Lobelia incana	Ornamental	Exotic	Perennial		1
Lobelia siphilitica	Ornamental	Exotic	Perennial								1				1
Lobularia maritima	Spontaneous (Subspontaneous)	Exotic	Annual					1			1
Lonicera caprifolium	Ornamental	Exotic (naturalized)	Perennial				1
Lonicera periclymenum	Spontaneous	Native	Perennial											1
Lonicera xylosteum	Ornamental	Native	Perennial	1
Lotus corniculatus	Spontaneous	Native	Perennial	1				1	1				1
Lysimachia arvensis	Spontaneous	Native	Annual					1
Lysimachia foemina	Ornamental	Native	Annual							1
Lysimachia thyrsiflora	Ornamental	Exotic	Perennial		1
Lythrum salicaria	Ornamental	Native	Perennial				1
Malcolmia maritima	Ornamental	Exotic	Annual												1
Malus sp	Ornamental	Native	Perennial												1
Malva alcea	Ornamental	Native	Perennial		1
Malva sylvestris	Spontaneous	Native	Biennial			1		1			1
Matthiola incana	Ornamental	Exotic	Annual		1
Medicago arabica	Spontaneous	Native	Annual												1
Medicago lupulina	Spontaneous	Native (archeophyte)	Biennial	1				1	1
Medicago sativa	Spontaneous	Native (archeophyte)	Perennial		1			1	1				1
Melilotus officinalis	Spontaneous	Native	Biennial					1
Melissa officinalis	Ornamental	Exotic	Perennial							1
Mentha suaveolens	Ornamental	Native	Perennial				1	1		1	1
Mirabilis jalapa	Spontaneous (Subspontaneous)	Exotic	Perennial							1
Muscari neglectum	Spontaneous	Native	Perennial				1	1
Myosotis arvensis	Spontaneous	Native	Annual									1
Myosotis sylvatica	Ornamental	Exotic	Biennial		1		1	1		1	1
Narcissus pseudonarcissus	Ornamental	Native	Perennial			1	1			1	1		1
Nepeta cataria	Ornamental	Native	Perennial							1
Nicotiana tabacum	Ornamental	Exotic	Annual			1
Nicotiana x alata	Ornamental	Exotic	Annual				1
Nigella damascena	Ornamental	Exotic	Annual		1						1
Oenothera biennis	Spontaneous	Exotic (naturalized)	Biennial							1
Oenothera glazioviana	Spontaneous	Exotic (naturalized)	Biennial		1
Oenothera lindheimeri	Ornamental	Exotic	Perennial		1			1		1	1				1
Origanum vulgare	Ornamental	Native	Perennial		1								1
Orlaya grandifolia	Ornamental	Native	Annual												1
Orobanche hederae	Spontaneous	Native	Perennial											1
Osteospermum ecklonis	Ornamental	Exotic	Perennial		1					1
Oxalis corniculata	Spontaneous	Native (archeophyte)	Perennial			1
Paeonia officinalis	Ornamental	Exotic	Perennial							1
Papaver nudicaule	Ornamental	Exotic	Biennial						1
Papaver rhoeas	Spontaneous	Native	Annual	1							1
Pelargonium inquinans	Ornamental	Exotic	Perennial			1	1				1				1
Pelargonium x hortorum	Ornamental	Exotic	Perennial						1
Pentas lanceolata	Ornamental	Exotic	Perennial								1
Perilla frutescens	Ornamental	Exotic	Perennial												1
Perovskia atriplicifolia	Ornamental	Exotic	Perennial		1
Persicaria orientalis	Ornamental	Exotic	Perennial				1
Petunia axillaris	Ornamental	Exotic	Annual				1
Phacelia tanacetifolia	Spontaneous (Subspontaneous)	Exotic	Annual								1
Philadelphus coronarius	Ornamental	Exotic	Perennial			1					1
Phlomis herba venti	Ornamental	Exotic	Annual												1
Phuopsis stylosa	Ornamental	Exotic	Perennial							1
Physostegia virginiana	Ornamental	Exotic	Perennial					1
Phytolacca acinosa	Ornamental	Exotic	Perennial					1
Picris hieracioides	Spontaneous	Native	Biennial	1		1		1	1		1	1	1
Pimpinella saxifraga	Spontaneous	Native	Perennial						1
Plantago lanceolata	Spontaneous	Native	Perennial	1					1			1
Plantago major	Spontaneous	Native	Perennial	1									1
Potentilla reptans	Spontaneous	Native	Perennial					1	1		1		1
Primula veris	Spontaneous	Native	Perennial						1				1
Primula vulgaris	Ornamental	Horticultural	Perennial		1	1		1	1	1	1				1
Prunella vulgaris	Spontaneous	Native	Perennial			1									1
Prunus spinosa	Ornamental	Native	Perennial	1					1				1
Pulmonaria officinalis	Ornamental	Exotic	Perennial				1
Ranunculus acris	Spontaneous	Native	Perennial			1							1	1
Ranunculus bulbosus	Spontaneous	Native	Perennial					1	1			1	1	1
Ranunculus repens	Spontaneous	Native	Perennial		1	1				1	1			1	1
Reseda lutea	Spontaneous	Native	Perennial						1
Rosa canina	Ornamental	Native	Perennial										1	1
Rubus fruticosus	Ornamental	Native	Perennial										1	1
Rubus occidentalis	Ornamental	Exotic	Perennial			1
Rudbeckia fulgida	Ornamental	Exotic	Perennial								1				1
Rudbeckia hirta	Ornamental	Exotic	Perennial		1		1		1		1				1
Rumex acetosella	Spontaneous	Native	Perennial			1
Salvia coccinea	Ornamental	Exotic	Perennial								1				1
Salvia farinacea	Ornamental	Exotic	Perennial				1				1				1
Salvia involucrata	Ornamental	Exotic	Perennial												1
Salvia microphylla	Ornamental	Exotic	Perennial				1			1
Salvia patens	Ornamental	Exotic	Perennial		1	1	1
Salvia pratensis	Spontaneous	Native	Perennial									1
Salvia splendens	Ornamental	Exotic	Perennial						1
Salvia uliginosa	Ornamental	Exotic	Perennial			1	1								1
Salvia viridis	Ornamental	Exotic	Annual			1
Sambucus nigra	Ornamental	Native	Perennial					1						1
Sanguisorba minor	Spontaneous	Native	Perennial										1
Saponaria officinalis	Spontaneous	Native	Perennial											1
Saxifraga x arendsii	Ornamental	Exotic	Perennial				1			1	1
Scabiosa atropurpurea	Ornamental	Exotic	Perennial								1
Scabiosa ochroleuca	Ornamental	Exotic	Perennial		1
Sedum rupestre	Ornamental	Native	Perennial						1	1
Senecio inaequidens	Spontaneous	Exotic (invasive)	Perennial									1
Senecio jacobaea	Spontaneous	Native	Annual				1				1	1	1	1
Seseli montanum	Spontaneous	Native	Biennial						1
Silene coronaria	Ornamental	Exotic	Perennial							1
Sinapis arvensis	Spontaneous	Native	Annual			1
Sisymbrium officinale	Spontaneous	Native	Annual		1			1
Solanum dulcamara	Spontaneous	Native	Perennial					1			1
Solanum nigrum	Spontaneous	Native	Perennial	1
Solanum pimpinellifolium	Ornamental	Exotic	Annual		1
Solanum sisymbriifolium	Ornamental	Exotic	Annual			1
Sonchus asper	Spontaneous	Native	Annual			1		1			1	1
Sonchus oleraceus	Spontaneous	Native	Annual		1	1					1
Sorbus latifolia	Ornamental	Native	Perennial	1
Spergularia rubra	Spontaneous	Native	Annual									1
Stachys byzantina	Ornamental	Exotic	Perennial					1
Stachys recta	Spontaneous	Native	Perennial						1
Sternbergia lutea	Ornamental	Exotic	Perennial			1
Symphyotrichum novi-belgi	Ornamental	Exotic	Perennial							1
Tagetes erecta	Ornamental	Exotic	Annual				1								1
Tagetes patula	Ornamental	Exotic	Annual				1
Tanacetum vulgare	Spontaneous	Native	Perennial						1
Taraxacum officinale	Spontaneous	Native	Perennial	1	1		1				1			1	1
Thalictrum aquilegiifolium	Ornamental	Exotic	Perennial				1
Thymus serpyllum	Ornamental	Native	Perennial			1
Tithonia rotundifolia	Ornamental	Exotic	Perennial												1
Torilis arvensis	Spontaneous	Native	Annual					1
Torilis nodosa	Spontaneous	Native (archeophyte)	Annual									1
Trifolium dubium	Spontaneous	Native	Annual	1
Trifolium pratense	Spontaneous	Native (archeophyte)	Perennial	1									1
Trifolium repens	Spontaneous	Native (archeophyte)	Perennial	1	1		1	1		1					1
Tristagma uniflorum	Ornamental	Exotic	Perennial					1
Tropaeolum majus	Ornamental	Exotic	Annual		1						1
Tulipa � gesneriana	Ornamental	Exotic	Perennial		1		1								1
Urospermum dalechampii	Spontaneous (Subspontaneous)	Exotic	Perennial								1
Urticia dioica	Spontaneous	Native	Perennial											1
Verbascum blattaria	Ornamental	Native	Biennial				1			1
Verbascum thapsus	Ornamental	Native	Biennial			1
Verbena bonariensis	Ornamental	Exotic	Perennial		1	1	1	1							1
Verbena officinalis	Spontaneous	Native	Perennial	1
Verbena rigida	Ornamental	Exotic	Perennial		1										1
Verbena tenera	Ornamental	Exotic	Perennial					1							1
Veronica chamaedrys	Spontaneous	Native	Perennial								1
Veronica hederifolia	Spontaneous	Native	Annual								1
Veronica persica	Spontaneous	Native (archeophyte)	Annual	1	1		1	1	1	1	1	1
Veronicastrum virginicum	Ornamental	Exotic	Perennial				1
Viburnum lantana	Ornamental	Native	Perennial	1		1							1
Viburnum opulus	Ornamental	Native	Perennial	1
Viburnum tinus	Ornamental	Exotic	Perennial			1
Vicia sativa	Spontaneous	Native	Annual			1		1	1
Vicia sepium	Spontaneous	Native	Perennial										1
Vinca minor	Spontaneous	Native	Perennial				1			1
Viola x cornuta	Ornamental	Horticultural	Perennial		1		1	1		1	1				1
Viola x wittrockiana	Ornamental	Horticultural	Perennial		1	1	1	1	1	1	1				1
Visnaga daucoides	Spontaneous (Subspontaneous)	Exotic	Annual			1
Zinnia angustifolia	Ornamental	Exotic	Annual								1
Zinnia elegans	Ornamental	Exotic	Annual				1
