# Supplementary material for: Diversity of greenspace design and management impacts pollinator communities in a densely urbanized landscape: the city of Paris, France
Source: Springer Nature journal article supplement (doi:10.1007/s11252-023-01351-x), 2023-03-30
Supplement: MOESM4 [file 25191116]

## Electronic supplementary material - 4

in Zaninotto Vincent, Fauvau Arthur, Dajoz Isabelle (2023) Diversity of greenspace design and management impacts pollinator communities in a densely urbanized landscape: the city of Paris, France. *Urban Ecosystems*

### Vincent Zaninotto (corresponding author)

Institute of Ecology and Environmental Sciences-Paris (iEES-Paris), Sorbonne Université, CNRS, IRD, INRAE, Université Paris Cité, UPEC. 4 place Jussieu, 75005 Paris, France.

Direction des Espaces verts et de l'Environnement, Ville de Paris. 103 avenue de France 75013 Paris, France.

Email: [vincent.zaninotto@normalesup.org](mailto:vincent.zaninotto@normalesup.org)

ORCID: 0000-0002-3397-398X

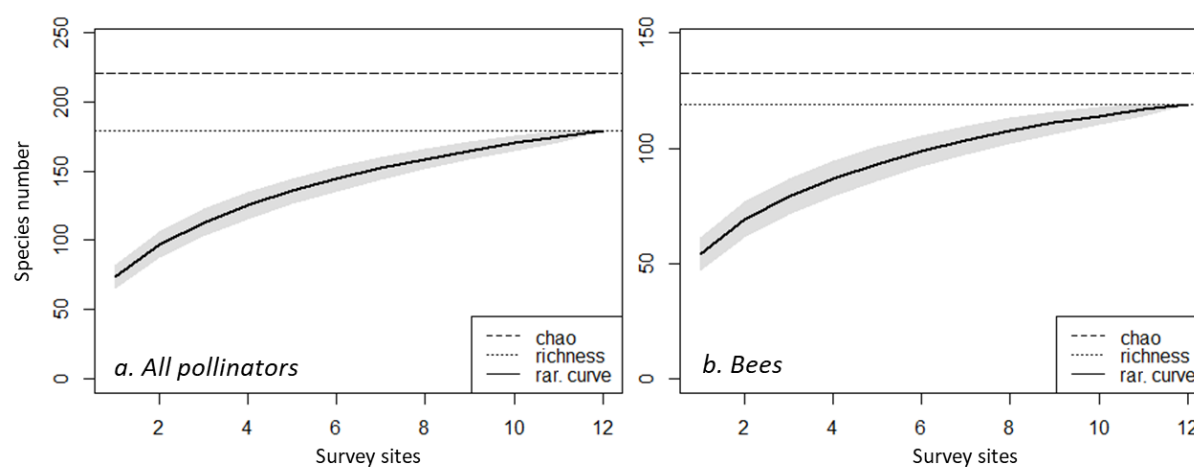

**ESM 4** Rarefaction curves across the 12 survey sites for all pollinators (a.) and wild bees only (b.).  
chao: Chao1 species richness indicator; richness: Total number of species across all sites. Rar. Curve: Rarefaction curve
